# Supplementary material
Source: Research Square preprint supplement (doi:10.21203/rs.3.rs-9076837/v1)
Supplement: Supplementary file 1 [file 1719c58c5d124bc1fb4f2d7b.docx]

**SUPPLEMENTARY DATA**

The supplementary data includes:

1. The prompt that was entered into ChatGPT.
2. Eighteen learner deficiency scenarios, followed by the expert published and ChatGPT feedback scripts.
3. The scoring rubric that was completed by faculty evaluators to evaluate each script.

**1. PROMPT FOR CHATGPT:**

*You are a pediatric faculty member at an academic teaching hospital. Please provide feedback in 3-4 sentences based on the following scenario:*

**2. Scenarios**

Scenario 1:

You are attending on the Pediatric Hospital Medicine team toward the end of the academic year. This week, you have been working with a third-year medical student named Rosana (she/her/hers). Rosana has completed every required clerkship except for Pediatrics and is now at the halfway point of the Pediatrics clerkship. She is enthusiastic about Pediatrics and has demonstrated excellent communication skills with families during patient- and family-centered rounds. Rosana’s presentations are sufficiently detailed, accurate, and reflect a thorough chart review; however, her assessments and plans need some work. She correctly recites the impression of the team and plan for the day but is unable to defend the rationale behind the diagnosis and/or management plan. For example, yesterday she admitted a 4-week-old with a fever. During rounds this morning she was able to correctly state the diagnosis “fever without source” and the management plan, “ceftriaxone.” However, when asked why she chose ceftriaxone, she stated, “because that’s what I have learned we use for fevers in kids under 3 months.” When asked why the child was admitted, she stated, “we admit all infants < 3 months who present with fevers, right?”

| Published Script | ChatGPT |
| --- | --- |
| Rosana, you are doing an excellent job accurately reporting the information relevant to your patient’s care and describing the plan provided by your supervising residents. However, as you transition to your role as an acting intern, it is imperative that you begin to develop your own assessments and plans. By offering WHY you want to do something or why a diagnosis is more likely than another, you can gain practice in showing the logic behind your decision making and we can help you progress toward independent practice. | Rosana, your enthusiasm for Pediatrics and your excellent communication skills with families are truly commendable. Your presentations are detailed and accurate, reflecting thorough chart reviews. However, I've noticed that while you can accurately state the team's diagnosis and management plan, you struggle with explaining the rationale behind these decisions. For example, understanding why ceftriaxone is chosen and why we admit infants under 3 months with fevers is crucial. Let's focus on enhancing your critical thinking and understanding of the medical reasoning behind our management plans. |

Scenario 2:

You have occasionally worked with Irina (she/her/hers), an intern, during night shifts but this is your first week on service with her. While you cringed at a few of her word choices when talking to families on prior admissions, she was able to convey the correct medical information to her patients and their parents. This week, however, you have noticed that Irina has little rapport with her families during patient- and family-centered rounds. She continually refers to the child as “the patient” when presenting at the bedside, even when the nurse reinforces the child’s name. She missed the parents’ shared shocked glances when she added “leukemia” to her differential diagnosis for fever and a limp during bedside rounds. And you have heard from the nurses that families are not being updated with new information or results after rounds. In fact, you’re not sure if she is even checking in with her families throughout the day.

| Published Script | ChatGPT |
| --- | --- |
| Irina, while I have worked with you, I have noticed that although you were able to give families correct information, your specific word choices, e.g., “It’s not like it’s deadly or anything” were confusing or possibly scary to families. Similarly, there have been times when, by not referring to patients by name, or by not following up to give families results, it can appear that you do not know or care about their child. I know that you want to provide good care to families. You will not be able to provide optimal care for patients without establishing a therapeutic alliance. Families need to trust you. | Irina, I've noticed that while you convey correct medical information, building rapport with families during patient- and family-centered rounds needs improvement. Referring to the child as “the patient” and not using their name can create a disconnect, as observed when the nurse reinforced the child's name. Additionally, mentioning “leukemia” in your differential without considering the parents' reactions highlights the need for more sensitive communication. It's also essential to keep families updated with new information or results throughout the day. Let's work on enhancing your bedside manner and communication strategies to ensure families feel informed and supported. |

Scenario 3:

You are on the service with a Koji (he/him/his), a senior resident. You have worked with him for a week now and have had a number of interactions with him on rounds as well as discussing patients overnight about management. You have noticed that often there were medication changes and execution of consultant plans without touching base with you as the primary hospitalist attending.

You were going to give some feedback at the end of the week because you feel that Koji may be a bit overwhelmed as a second-year senior resident. Overnight you had multiple conversations with Koji about minor patient issues but when you got in the next morning, there were a few major issues that didn’t get discussed in managing your patients (including a rapid response that was not relayed to you until you got to work the next morning).

| Published | ChatGPT |
| --- | --- |
| Koji, being a first time senior is very difficult and learning all the different roles and executing  them while taking care of all the patients bring on new challenges. Orders have been carried out without first discussing with me and this morning I came in to find out a rapid response was called on one of our patients and you didn’t notify me. I am concerned that you are trying to take on too much responsibility and burden without asking for help and guidance. Even though you are a senior leading the team, you are also here to learn how to manage a team and learn about your limitations and when to ask for help. Having expectations set too high for yourself can preclude you from acknowledging your learning points and keep you from growing. Asking for help is not a sign of weakness, but rather medicine is a collaborative approach. Sometimes it gets busy, and people forget or people are at times worried about calling the attending, but I want to assure you that I want to get those calls and have those discussions with you. | Koji, I appreciate your dedication and initiative in managing patient care. However, I've noticed that there have been several instances where significant medication changes and consultant plans were executed without consulting me as the primary hospitalist attending. Additionally, not being informed about major issues, such as a rapid response, until the following morning is concerning. It’s crucial to maintain open communication, especially with significant developments, to ensure cohesive and safe patient care. Let’s work on improving our communication flow to support you better in your role. |

Scenario 4:

Benjamin (he/him/his) is an intern doing his second ward rotation on the inpatient service. You heard from one of your colleagues that on his first ward rotation he tended to be defensive when his plans or comments are challenged. You, too, have noted that he continues to exhibit this behavior. For instance, when you suggested ampicillin for a patient with uncomplicated community- acquired pneumonia, he let out a sigh, crossed his arms, and said the last patient he had with pneumonia they used ceftriaxone. He quite often states he, "just wants to understand" when it comes to patient care, however, the perception of his attempt to learn is that he is being argumentative just to be argumentative, and it is felt that he often does not have the appropriate knowledge base to back up his assertions.

| Published | ChatGPT |
| --- | --- |
| I noted that when other options for decisions and plans you make are proposed your response suggests you don’t agree and are not interested in the alternative point of view. For example, when I recommended Ampicillin for a patient with uncomplicated community-acquired pneumonia, your body language appeared to me that you didn’t agree and you shared that your management plan was influenced by a prior patient with pneumonia. As lifelong learners we encourage and welcome healthy discussions regarding medical decision-making. We ask, however, that you think critically about how you respond to these discussions. It is important to go to the literature and support what you are endorsing and to consider how (i.e., tone, body language, evidence) you go about responding to differing opinions. | Benjamin, I've noticed that you sometimes become defensive when your plans or comments are challenged, as seen when you reacted to the suggestion of using ampicillin for community-acquired pneumonia. While it's great that you want to understand patient care decisions, your approach can come across as argumentative rather than inquisitive. It's important to foster a collaborative learning environment, and being open to feedback without defensiveness will help you grow and gain the knowledge you need. Let's work on approaching these discussions with curiosity and a willingness to learn. |

Scenario 5:

You have recently joined your institution as a pediatric hospitalist and are meeting most of the residents for the first time. It is October, and you are on service with a team of residents you have yet to work with. It has been a very busy ward week, and overall, the team has remained positive and engaged, though there have been days when they seemed overwhelmed, and things were missed.

It is nearing the end of your service week and you are arranging time with the team members to sit down and give feedback. When you get to Maya (she/her/hers), a third-year resident, she isn’t forthcoming with times that would work and states on multiple occasions that she is busy and needs to get tasks done. You are finally able to set up a time to meet with Maya to give feedback. As you are reflecting on the week in preparation for the feedback session, you note that she hasn’t been responsive to feedback on multiple occasions. Maya overall is a strong resident and most of the time her clinical judgment and management plan coincide with yours. However, there were a few occasions when they differed. For example, with a 4mo patient with fever, you discussed appropriate work up based on history. With the next fever spike, she reverted back to her original plan instead of the one you discussed. When going through the plan again, she was not interested in ‘why’ and instead sought reassurance that the right steps were taken. You are hoping to address this during your upcoming feedback session.

| Published | ChatGPT |
| --- | --- |
| You are a clinically competent and high functioning senior resident and during this busy week, you have led your team well. I would like to discuss our feedback sessions and incorporation of the feedback. During this week, we discussed management plans and what we discussed was not incorporated into the plan. If something wasn’t clear, I am more than happy to rediscuss the rationale or discuss things that you may not agree with.I also noticed that when trying to plan this feedback session, it was hard to schedule with you, and I wanted to discuss further to see if there was any reason you may have been hesitant to meet. Being a senior resident is hard and there is always learning and improving involved. How can we work through this together to make it better? | Maya, I appreciate your strong clinical judgment and the alignment of most of your management plans with mine. However, I've noticed that on a few occasions, you reverted to your original plan rather than the one we discussed, such as with the 4-month-old patient with a fever. Additionally, there seems to be a pattern of not engaging with the rationale behind certain plans and instead seeking reassurance. It's important to remain open to feedback and understand the reasoning behind different approaches to enhance your clinical skills further. Let's work on improving this aspect to ensure the best patient care. |

Scenario 6:

Eric (he/him/his) is a 3rd year medical student who has been on this rotation for 1 of 2 weeks and is about halfway through his 3rd year clerkships. He carries a patient load of 1 to 2 patients each day. He comes to work on time and prepares for rounds gathering all the necessary data. He is engaged on rounds giving complete presentations, teaching the team what he learned about the diagnosis/medication, answering and asking questions when warranted. He appears motivated to learn more about the specialty. After rounds, however, he fails to follow through on tasks, call consults independently, check that his patients’ orders are correct, or assist his team members who are carrying more patients. He often reports that he will be reading and for his senior to call him if needed.

| Published | ChatGPT |
| --- | --- |
| Taking full ownership of your patients means being fully involved from admission, work up, and creating a management plan to calling consultants, reviewing images, reading more about the differential diagnosis and management plan. I see you very invested in rounds and then I don’t see the same level of investment in other activities and tasks important to patient care and your education. For instance, you didn’t call the cardiology consult on your patient the other day and told your senior that instead you would be studying and he could call you if you were needed for anything.  By over relying on others to complete your work and know your patients I worry that you aren’t getting what you need for your education and your peers are taking on extra work. The team cohesiveness also may suffer when not everyone is available to help. Let’s discuss what your roles are as a medical student and reflect on what might be contributing to this issue. | Eric, I appreciate your punctuality, preparation for rounds, and engagement during discussions. Your presentations are thorough, and it's clear you're motivated to learn more about the specialty. However, I've noticed that after rounds, you often fail to follow through on tasks, call consults independently, or assist your team members. To grow as a clinician, it's crucial to be proactive in all aspects of patient care, including post-round responsibilities and supporting your team. Let's work on enhancing your involvement and follow-through to ensure comprehensive patient care and teamwork. |

Scenario 7:

Your hospital has adopted I-PASS as a structure for patient handovers. It is September and Darby (they/them/theirs), a PGY1 resident, is on their first block of night shifts. Their role includes being first call to inpatient issues that occur overnight, as well as do admissions. It is their mandate to update patient lists and verbally handover night issues to the day teams, of which you are the preceptor of one of them.

Darby seems to be a pleasant, keen resident, who has a solid foundation of pediatric knowledge. They deliver their handovers in a confident matter. However, you start to realize that the handover sheets are not being updated with essential information with regards to newly admitted patients. Nor are overnight issues relayed such that when you review the patient with the nurses, or at bedside rounds, you feel you can rely on their accuracy. You feel there is significant risk for ongoing medical error, especially after you were told a patient with gastroenteritis was made NPO for worsening symptoms overnight, but that a stool-replacement IV order was missing, as was the order for follow-up labs, even though they handed over that these were the issues and plans.

| Published | ChatGPT |
| --- | --- |
| Darby, you clearly demonstrate a solid foundation of pediatric knowledge when you handover patients in the morning. Unfortunately, what you have relayed verbally, doesn’t accurately reflect what was done for your patients. While you may feel you have communicated the necessary and accurate information, we are ultimately responsible for whether that information makes it to the patient. These issues can create a safety issue for our patients even if that is not our intent. There is a specific case that I want to bring to your attention, to underscore this impression. I also have noted that the handover sheets are not being consistently updated with new issues and change in plans that have occurred overnight. This has resulted in members of the day team having to spend extra time ensuring that the handover list for nights is updated and accurate. | Darby, I appreciate your enthusiasm and solid foundation of pediatric knowledge, as well as your confident delivery of handovers. However, I've noticed that essential information is often missing from the handover sheets, particularly regarding newly admitted patients and overnight issues. This lack of detail can lead to significant medical errors, as seen with the recent gastroenteritis case where critical orders were missing despite being discussed. It's crucial to ensure that all relevant information is accurately documented and communicated to maintain patient safety. Let's work on improving the thoroughness and accuracy of your handovers to enhance patient care continuity. |

Scenario 8:

Christos (he/him/his) is one of your PGY2 residents. Colleagues have described him as conscientious and thorough junior resident and easily able to manage 5-6 patients, though it is noted he often stays late to complete documentation. The objectives in transitioning to senior level duties include management of 8-9 patients. He is assigned some of the more complex patients on the team, as well as asked to supervise and help manage the medical students’ assigned patients.

You are the attending of the team which is currently particularly busy with high patient census, as well as some unwell, undifferentiated patients. You note that after the first three days on service, while preparing for evening sign out, Christos appears flustered. Some of the action items for his patients, that were agreed upon earlier, have not yet been done. Discharge counselling and orders are pending. His notes for the day are still not charted. You know that he has been staying late to complete his work before leaving the hospital. You ask if you could meet with him privately. When you bring up concern for getting work done in a timely fashion, and what might you be able to do to help him, he seems to be fighting back tears. He tells you that he is spending a lot of time helping the medical students, and then finding he’s not as able to care for his patients as he was accustomed when he was an intern.

| Published | ChatGPT |
| --- | --- |
| Christos, it is apparent to me that you really care about the work that you do. I have heard feedback from other physicians that you are thorough and conscientious, and I see evidence of that because you are staying late, and completing all designated tasks of the day, to the best of your ability. It can be a fairly significant transition to take on a supervisory position as well as manage multiple sick patients. Sometimes it is important to recognize your limitations and ask for help, in the interest of ensuring patient safety and flow. I’m also concerned that if you keep up this current practice pattern, you are at risk of burn-out. | Christos, I've noticed your dedication and thoroughness in managing your patient load, and it's clear you're committed to providing excellent care. However, with the increased responsibilities of handling more complex patients and supervising medical students, it seems you're feeling overwhelmed, which has impacted your ability to complete tasks on time. I appreciate your willingness to support the students, but it's crucial to balance this with your own responsibilities. Let's work together to develop strategies for time management and prioritization, and I'll provide any additional support you need to ensure you can effectively manage your workload and maintain your well-being. |

Scenario 9:

Elio (he/him/his) is an intern on hospital pediatrics as his third inpatient rotation. He has a good fund of knowledge and works well with teammates. He seems very organized and gives well thought-out presentations and plans for rounds. However, during his presentations on patient- and family-centered rounds (PFCR), he often uses medical jargon which confuses families and causes undue worry. He also rarely involves families in care plans and fails to recognize when families have questions or concerns which have not been addressed. You and the senior resident have had to step in and invite family participation as well as extend rounding time to explain plans to families. You are unsure of his experience with PFCR as a student, but know that other inpatient rotations use similar methods as your team.

| Published | ChatGPT |
| --- | --- |
| I appreciate that you have collected appropriate histories and have plans ready for rounds. However, I have noticed that you infrequently involve patients and families during these discussions on PFCR. It is important to include patients/families in the development of treatment plans, as individual and cultural differences greatly determine adherence to and success with medical treatment. Using easy-to-understand language aids in family understanding, but also solidifies your knowledge of the topic. | Elio, I appreciate your solid fund of knowledge, organization, and well-thought-out presentations. However, I've noticed that during patient- and family-centered rounds, you often use medical jargon that confuses families and causes undue worry. Additionally, you rarely involve families in care plans and sometimes miss their questions or concerns. It's important to ensure clear, compassionate communication and actively involve families in the discussion. Let's focus on improving these aspects to enhance family engagement and understanding during rounds. |

Scenario 10:

Helena (she/her/hers) is an intern on her second inpatient wards rotation. She has been doing well clinically and is prepared for rounds each day. However, after your first day on service, you notice that her notes regularly contain outdated and inaccurate information about her patients (for example, level of respiratory support or labs), and her notes are very extensive, reading as a narrative of the entire hospital stay rather than focusing on the current active issues and changes in management for the day. She also routinely leaves out family history and review of systems from her admission history and physicals. You use this as an opportunity to review note writing principles with the team, but even after this discussion, Helena’s notes do not change and continue to contain irrelevant and incorrect information.

| Published | ChatGPT |
| --- | --- |
| Helena, I’ve noticed that your notes often contain information that is incorrect, outdated or no longer relevant to the current plan of care. For example, your notes have stated that Patient X has been on oxygen support for the last 3 days, when s/he has been on room air for the last 48 hours. Documentation is an important aspect of communication between care team members and if data is incorrect, this can lead to mistakes in patient care. Additionally, accurate notes are our professional responsibility as providers. Documentation is also used to support our professional billing codes and incomplete data (such as incomplete review of systems or absence of social or family history) can impact your ability to accurately bill for your services in the future. | Helena, I appreciate your clinical skills and your preparation for rounds. However, I've noticed that your notes often contain outdated and inaccurate information, and they tend to be overly extensive, reading as a narrative rather than focusing on the current active issues and changes. Additionally, you frequently leave out family history and review of systems from your admission notes. Despite our discussion on note writing principles, these issues persist. Let's work together on refining your note-taking skills to ensure accuracy and relevance, which are crucial for effective patient care and communication. |

Scenario 11:

You are finishing your second block of time working with Trinh (she/her/hers), a pleasant, quiet, studious intern. Whenever you have spoken with Trinh, she is always engaged and seems grateful for any teaching (and frankly any direction) that you can give to her. She is clearly reading about her patients, as evidenced by the times you saw her on the NIH website or with a journal article in hand. Yet her presentations are very much those of a third-year medical student: mainly reporting details, without thoughtful synthesis, and without a proposal for or modification of plans. You know that she is capable of more, but she continues to hang back and looks to her senior frequently during rounds to confirm everything that she is saying. There are glimmers of insight in how she phrases things, but when probed for understanding, her reasoning is unfiltered and lacks synthesis. You have seen her senior working with her, and you are not sure if she is timid/anxious or has true knowledge gaps.

| Published | ChatGPT |
| --- | --- |
| Trinh, you are a dedicated member of the pediatrics team, and I appreciate your contributions. However, I have concerns that you are not progressing in your patient ownership and medical reasoning from the beginning of the intern year. Your presentations are more recitation rather than synthesis of information. I have not heard suggestions for making or modifying patient management plans. I am wondering if you are having difficulty with synthesizing patient information or anxiety in expressing your thoughts. You will soon be the person “in charge” and others will look for you for guidance in understanding patients’ clinical concerns and plans. I am not sure what is behind this difficulty, but I have a few suggestions for how to improve. | Trinh, I appreciate your dedication to learning and your engagement during our discussions. It's clear that you're putting in the effort to read about your patients, which is commendable. However, your presentations tend to focus on reporting details without thoughtful synthesis or proposing modifications to the plans. I believe you are capable of more and encourage you to work on synthesizing information and confidently sharing your reasoning and proposals. Let's focus on building your confidence and critical thinking skills to enhance your presentations and patient care. |

Scenario 12:

You are attending on the Pediatric Hospital Medicine team. In addition to your residents, your team consists of three third-year medical students rotating on their core Pediatrics clerkship. Over the course of your week with the team, you notice that one student, Beth (they/them/theirs), seems a little more aggressive than most students. During rounds, you will pose questions to one of the other two students, and Beth will immediately offer their answer without allowing their peers the opportunity to speak. Their responses are often inaccurate and you observe growing irritability on the face of their peers. On one occasion you asked for a volunteer to demonstrate proceeded to pepper the other students with questions while she was walking through the exam steps. Beth made several mistakes during their demonstration of the examination and in each circumstance replied, “oh yeah, I know, that’s what I meant.”

|  | ChatGPT |
| --- | --- |
| Beth, I can see that you have an exceptional interest in this rotation and are motivated to share your thoughts regarding patients on the team. However, it’s important to allow others the opportunity to demonstrate their knowledge as well by giving them the chance to respond to questions. I worry that team dynamics and the trust the team places in you may suffer if you answer before your teammates. The resulting tension between yourself and your peers is likely giving people the wrong impression of your intentions. In addition, at this stage of your training, you are not expected to know everything and you should try to be more open to others’ feedback. | Beth, I appreciate your enthusiasm and willingness to participate during rounds. However, I've noticed that you often respond to questions directed at your peers, which can prevent them from having the opportunity to speak and learn. Additionally, while your eagerness to demonstrate skills is commendable, it's important to be open to feedback and acknowledge mistakes rather than dismissing them. Let's work on fostering a more collaborative environment by giving your peers space to contribute and focusing on learning from each experience. |

Scenario 13:

It is August, and you are working with Henri (he/him/his), a 2nd-year resident who is in his first inpatient leadership role. You worked with him as an intern, and you were always impressed with his knowledge base. Even now he has strong foundational knowledge, and he maximizes that by frequently utilizing the literature to support his plans. Unfortunately, you have noticed that he is resistant to any clinical treatment recommendations that you make that are discordant with his. On several occasions, both in front of and away from the team, he has repeatedly challenged your assertions, either by referencing literature or by repeating a guideline he read. Despite your explanations about how this patient might differ from those in the papers he has read, or by emphasizing your experiences with similar patients in the past, he at best will mumble “fine” and then gets silent for the rest of rounds. He has similarly presented consultant recommendations to you in a negative way when he has not agreed with them.

| Published | ChatGPT |
| --- | --- |
| Henri, you clearly read about your patients and build on a strong foundation of knowledge through access of the literature, which is laudable. Your appraisal of that literature is circumspect, and I feel you are advocating for your patients without understanding the differences between study populations and individuals. This may result in you asserting an inaccurate plan, and when I propose a counter plan, I find you are defensive about my disagreement. It’s important to value the experience and knowledge of others as much as the literature. If you do this I think you will hone your clinical acumen (or be a better clinician). By role modeling adaptive, inquisitive behavior, your learners will be able to see how to do so as well. It’s important to always respect the opinions of all members of the team with an open mind and positive attitude, especially in the context of discussions at bedside. | Henri, I continue to be impressed by your strong knowledge base and your commitment to supporting your plans with literature. However, I've noticed that you often resist clinical treatment recommendations that differ from your own, both in front of the team and privately. It's important to remain open to different perspectives and to understand that individual patient circumstances may require deviations from standard guidelines. Let's work on fostering a more collaborative approach and being open to discussion and adaptation in patient care to ensure the best outcomes for our patients. |

Scenario 14:

Jeff (he/him/his) is a third-year medical student halfway through his clinical rotations. He is frequently found reading textbooks and has a strong knowledge of disease pathophysiology. He can recite extensive differential diagnoses for common pediatric problems (i.e. respiratory distress, abdominal pain), but has had difficulty using clinical observations and physical exam skills to develop a prioritized problem list with most likely diagnoses and is not yet able to use this information to develop management plans. For example, in caring for an infant with increased work of breathing and mild hypoxia, he was able to describe the most likely organisms to cause bronchiolitis vs. pneumonia, but when asked to use data obtained from his history and physical to generate the most likely etiology of illness in his patient, he was unable to identify hallmark features of bronchiolitis.

| Published | ChatGPT |
| --- | --- |
| You have a strong background in disease pathophysiology and can explain individual disease processes. This is an important background to have when learning to care for patients. However, I have noticed that you have difficulty narrowing down your differential based on clinical history and examination, and often list a variety of unrelated diagnoses rather than highlighting the most likely etiology of a patient’s presentation. Appropriately identifying the most likely diagnoses can have significant implications for developing a treatment plan for your patients. | Jeff, I appreciate your strong knowledge of disease pathophysiology and your dedication to learning, as evidenced by your frequent reading. However, I've noticed that while you can recite extensive differential diagnoses, you're struggling to use clinical observations and physical exam skills to prioritize these lists and develop management plans. For instance, despite understanding the causes of bronchiolitis and pneumonia, you had difficulty identifying hallmark features of bronchiolitis in a specific patient case. Let's focus on honing your ability to integrate clinical findings with your theoretical knowledge to make more accurate and practical clinical decisions. |

Scenario 15:

In your system, attending physicians take call from home after 7 pm while a night rotation resident team (one intern and one PGY-2 resident) provides in-house coverage for general pediatrics patients. This week, you are working with Jyoti (they/them/theirs) a second-year resident who is serving as the night senior. On your first night, you receive no phone calls or pages from Jyoti. Thinking the team had an easy night, you come to work the next morning surprised to hear that the team admitted 7 patients to your service, several of whom have rather complicated disease processes. For example, one patient is a 4- year old ex-NICU grad who is ventilator/tracheostomy/G-tube dependent, with cerebral palsy and developmental delay who came in for concern of aspiration pneumonia. The outside referring ED gave the child a dose of ceftriaxone before sending the child to your hospital overnight. Jyoti continued that management plan. When speaking with colleagues, they mention similar concerns about Jyoti failing to contact them for issues regarding patients.

| Published | ChatGPT |
| --- | --- |
| It’s excellent that you can efficiently care for patients without seeking our help for every case. However, it’s important that we always critically review the management plan and identify when we are unsure of how to proceed. Those are the situations in which it’s imperative to run our intended plans by someone more senior than us to get their opinion so we can learn and develop our own style for the future management of similar patients. | Jyoti, I appreciate your capability in managing a busy night with multiple admissions, including complex cases. However, it's crucial to maintain open communication with attending physicians, especially for complicated cases like the ventilator-dependent child with multiple comorbidities. Not contacting me or your colleagues during such situations can lead to suboptimal patient management and increased risk. Let's focus on improving your communication practices to ensure you reach out for guidance when handling complex patient cases, ensuring the best care and support. |

Scenario 16:

You are working with a second-year senior resident Rahim (he/him/his). This is his first month on the ward, and he was a highly organized and efficient intern. You have now worked with him the past few days and notice that he checks in with each intern and runs the list multiple times a day. In some of your discussions with the interns they have noted not having enough autonomy and having too many “check the list” sessions a day. In addition, you notice that Rahim is fielding a lot of the calls and putting in all of the orders to the point where there has been duplicating orders in the chart. You sit in on handoffs and notice that handoffs are taking extra time because Rahim is interrupting the interns and asking detailed questions and clarifications on each patient and the interns look a bit worn out. You are concerned that Rahim has not fully embraced the senior role and has not been learning to delegate effectively.

| Published | ChatGPT |
| --- | --- |
| Rahim, the first time being a senior resident can be very difficult as you are learning a new role while having to adjust to different interns styles and skill levels. Especially for a person who is as detail oriented and efficient as you are, it may feel like you are losing a bit of control because the tasks are being done by someone else and differently than you would. I have observed the multiple check-ins you have with the interns, and at times you are doing a lot of their work. Do you remember this happening to you as an intern? It may make interns feel like they aren’t doing their job well, or that their role isn’t well defined. What are the factors that are making it difficult to delegate tasks, and how can I assist with helping you take on more of a leadership role with delegation while being able to be on top of everything at the same time? | Rahim, I appreciate your organization and dedication to ensuring thorough patient care. However, I've noticed that you're checking in with interns and running the list multiple times a day, which is affecting their autonomy and leading to some frustration. Additionally, by fielding most of the calls and placing all orders, you're inadvertently causing order duplications and extending handoff times with detailed interruptions. Embracing your senior role involves learning to delegate effectively and trusting your interns to manage their tasks. Let's work on balancing oversight with giving interns the space to develop their skills and autonomy. |

Scenario 17:

It is July, and you are on service with a team that includes a brand new senior, Shea (she/her/hers), interns, and students. You spoke to Shea before you joined the team, and she emphasized that a key non-patient care goal for them was to establish a positive and supportive learning environment. You have noticed that everyone on the team is excited and eager to be engaged in patient care and learning. The team dynamic is very positive. The patient load has been manageable, but enough to challenge the team, and the team has handled it well on most days. Most patient care tasks are getting done efficiently and effectively, more than you would expect for a new set of interns. While giving feedback to your interns at the end of your first week of service (their third) you find out that Shea has been completing most of the practical tasks of service, including writing orders, calling consults, completing the sign-out, and putting in discharge orders. The interns are appreciative, but they feel as though they are not learning the skills needed to be effective interns during the rest of the year. Two of the interns note that they have asked for more responsibility, but they have not received it. This prompts you to realize that Shea is most flustered on clinically busy/high-volume days, making the team inefficient. Shea often responds to your calls about patient care issues by saying she will “get right on it”. You assumed that meant she would tell the intern to manage it, but now you realize that she has been fulfilling both senior and intern roles.

| Published | ChatGPT |
| --- | --- |
| Though you have established a supportive environment for your team, you have done so at the expense of the interns learning how to provide patient care. You write their orders, complete the sign-out, and discharge patients for them. If this continues, they will finish one of their inpatient months with no improvement in skills. You have taken on the job of three interns as well as your senior role. When we are busy, this has decreased efficiency in patient care, you seem overwhelmed, which may affect team morale. Finally, I think it’s important for you to listen to your interns when they ask to do more. You create such a great environment for your team, now let them help contribute to that. | Shea, I appreciate your efforts in creating a positive and supportive learning environment, which is clearly reflected in the team's dynamic and enthusiasm. However, I've noticed that you have been handling most of the practical tasks, such as writing orders and calling consults, which is limiting the interns' opportunities to learn and develop their skills. While your intention to support the team is commendable, it's important to delegate these tasks to the interns to help them grow. Let's work on giving them more responsibility and guiding them through these tasks, especially on busy days, to ensure they gain the experience they need. |

Scenario 18:

Noor (she/her/hers) is at the end of her 2nd year of residency and has worked with you previously on hospital pediatrics. She seems invested in her patients and the care team and is well-liked by the nurses. She has provided research papers several times to support her evidence-based decision making. You have noticed, however, that two of her patients had sedations delayed because they were not properly made NPO before the procedure. Today, a discharge was delayed because a medication prior authorization was not completed (despite the discharge medications being planned for more than 3 days). She is very apologetic over the situation and seeks you out to discuss this morning’s delay.

| Published | ChatGPT |
| --- | --- |
| I appreciate that you have developed some patient care plans based on current evidence. Where you can continue to work is on anticipating patient needs. I have noticed that some patient care items (imaging, discharges) have been delayed because prerequisite tasks were not completed. In instances where protocols mandate specific steps be completed before carrying out the care plan (prior auths, NPO for x hours, etc.), failure to anticipate these steps causes longer LOS, bigger healthcare bills, treatment delays, and higher risk of hospital-acquired infections. | Noor, I appreciate your dedication to your patients and your use of evidence-based decision-making, which is clearly valued by the care team and nurses. However, I've noticed some issues with procedural preparations, such as patients not being made NPO for sedations and a discharge delay due to an incomplete medication prior authorization. These delays can impact patient care and workflow efficiency. Let's work on improving your attention to these logistical details to ensure smooth and timely patient care processes. |

**3. Scoring Rubric**: this tool was utilized by the raters to assess the quality of the feedback scripts.

|  | No (0) | Somewhat (1) | Yes (2) |
| --- | --- | --- | --- |
| Behavioral, not personal |  |  |  |
| Balanced between positive and negative |  |  |  |
| Non-judgmental |  |  |  |
| Focused |  |  |  |
